# Supplementary material for: Rare Primary Mitochondrial DNA Mutations and Probable Synergistic Variants in Leber’s Hereditary Optic Neuropathy
Source: PubMed Central journal article supplement (PMC3411744; doi:10.1371/journal.pone.0042242), 2012-08-03

**Figure S1.**

**Pedigrees of LHON families.** Family ID numbers, mtDNA mutations and haplogroup affiliations are reported. Symbol definitions are also indicated. Probands are identified by black arrows.

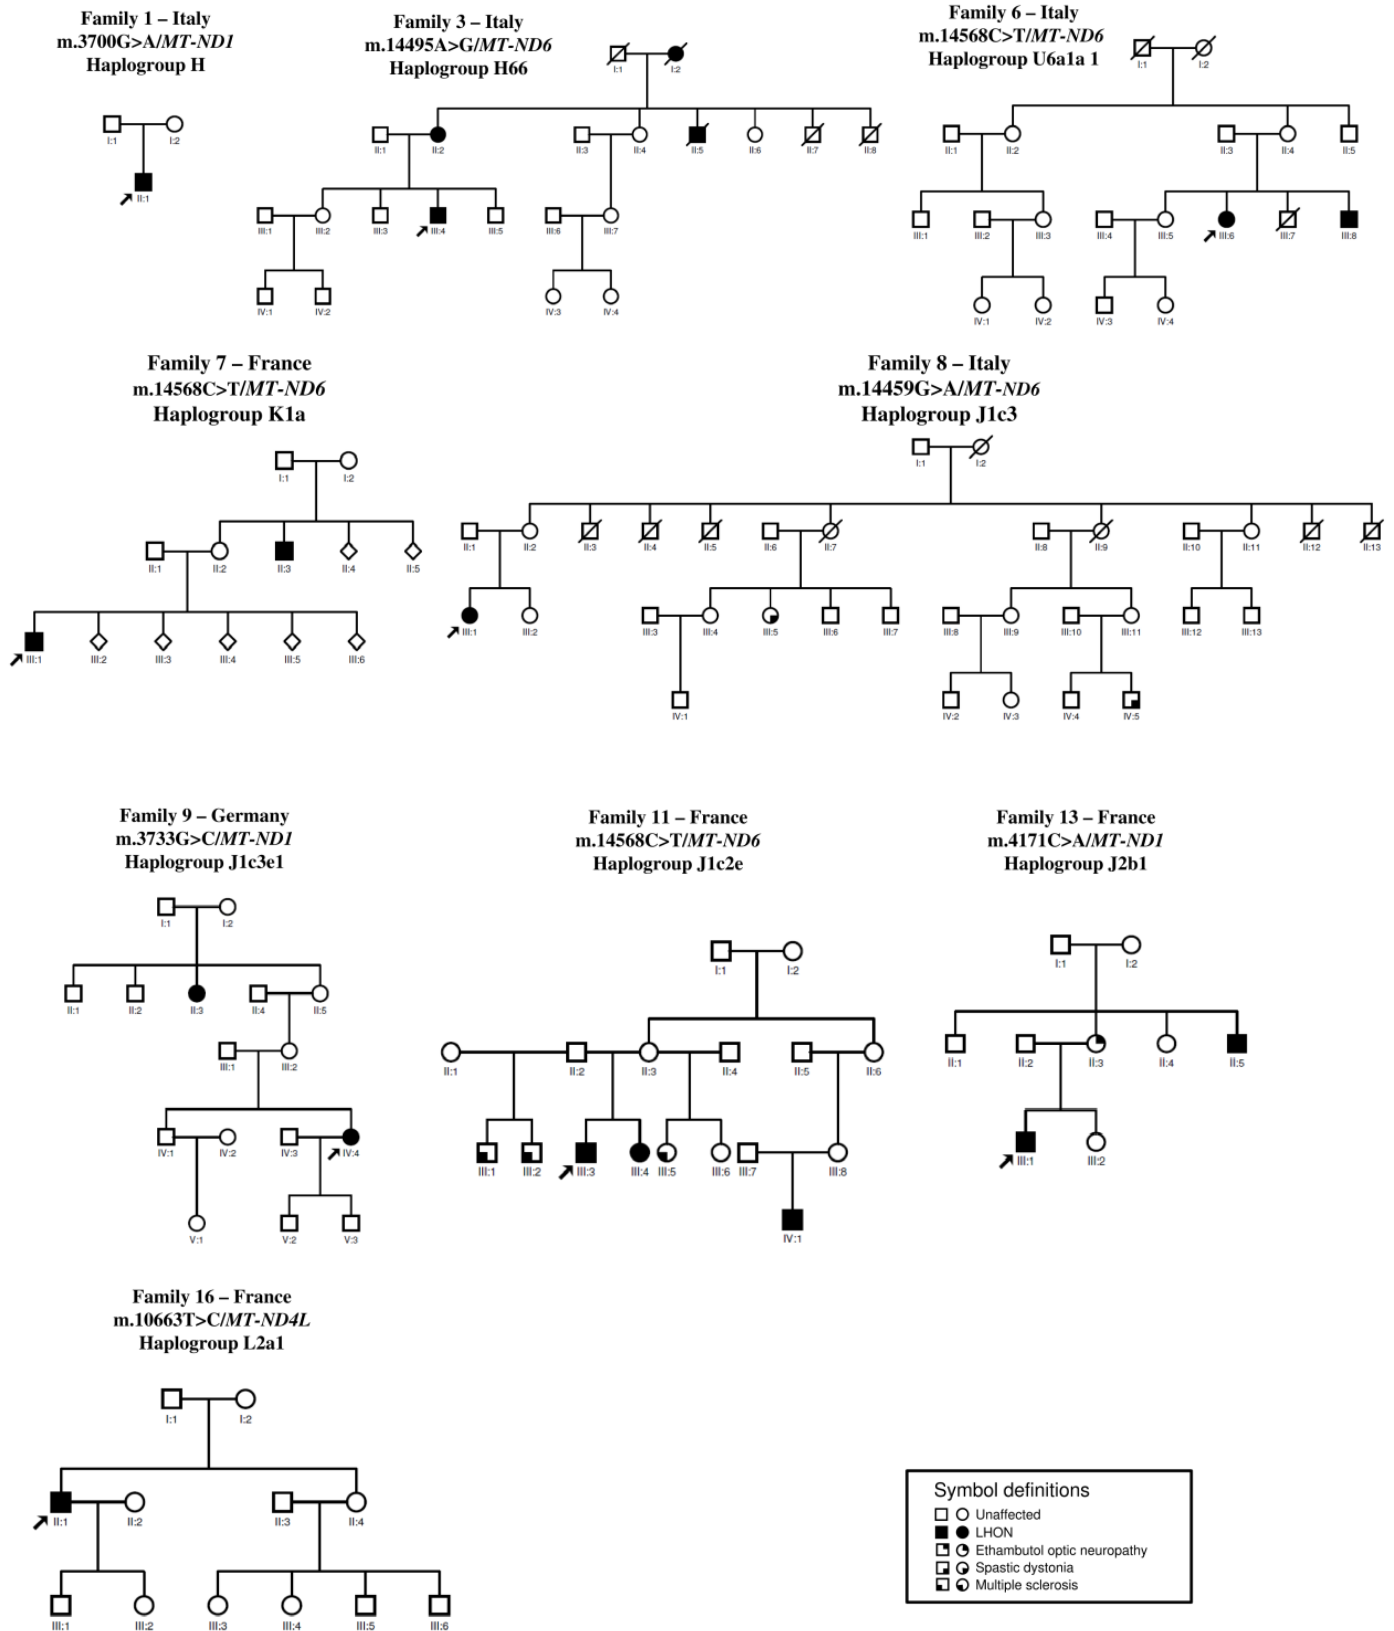

Supplement: pone.0042242.s001.pdf [file pone.0042242.s001.pdf]
