# Supplementary material for: Rare Primary Mitochondrial DNA Mutations and Probable Synergistic Variants in Leber’s Hereditary Optic Neuropathy
Source: PubMed Central journal article supplement (PMC3411744; doi:10.1371/journal.pone.0042242), 2012-08-03
Supplement: pone.0042242.s005.pdf [file pone.0042242.s005.pdf]

**Table S4.** PCR oligonucleotides and restriction enzymes employed to evaluate heteroplasmy of LHON rare mutations <sup>a,b</sup>.

| Map Locus-Mutation         | Primer | Nucleotide position | Sequence                        | Restriction Enzyme |
|----------------------------|--------|---------------------|---------------------------------|--------------------|
| m.3700G>A/ <i>MT-ND1</i>   | Fw     | 3441-3460           | ACTACAACCCTTCGCTGACG            | <i>HhaI</i>        |
|                            | Rv     | 3940-3920           | TGAAGCCTGAGACTAGTTCGG           |                    |
| m.3733G>C/ <i>MT-ND1</i>   | Fw     | 3501-3520           | ATCTACCATCACCTCTACA             | <i>NdeI</i>        |
|                            | Rv     | 3940-3920           | TGAAGCCTGAGACTAGTTCGG           |                    |
| m.4171C>A/ <i>MT-ND1</i>   | Fw     | 4011-4030           | CACCCTCACCACTACAATCT            | <i>NdeI</i>        |
|                            | Rv     | 4301-4281           | TTACTCTATCAAAGTAACTCT           |                    |
| m.10663T>C/ <i>MT-ND4L</i> | Fw     | 10357-10377         | TAAGTCTGGCCTATGAGTGA            | <i>BcuI</i>        |
|                            | Rv     | 10930-10911         | GGAAAAGGTTGGGGAACAGC            |                    |
| m.14459G>A/ <i>MT-ND6</i>  | Fw     | 14430-14458         | ATGCCTCAGGATACTCCTCAATAGCCGTC   | <i>MaeIII</i>      |
|                            | Rv     | 14594-14563         | ATGGGGGTTTAGTATTGATTGTTAGCGGTG  |                    |
| m.14495A>G/ <i>MT-ND6</i>  | Fw     | 14464 -14494        | AGTATATCCAAAGACAACCATCATTCCCCAT | <i>NlaIII</i>      |
|                            | Rv     | 14594-14563         | ATGGGGGTTTAGTATTGATTGTTAGCGGTG  |                    |
| m.14568C>T/ <i>MT-ND6</i>  | Fw     | 14407-14424         | CAAGACCTCAACCCCTGA              | <i>AciI</i>        |
|                            | Rv     | 14705-14682         | CATTGGTCGTGGTTGTAGTCCGTG        |                    |

<sup>a</sup> The mutations 3733G>A/*MT-ND1* and 14482C>A/*MT-ND6* were already tested by Valentino et al. 2004[8] and Valentino et al. 2002 [11], respectively.

<sup>b</sup> In addition the possible synergistic mutation 4172T>A/*MT-ND1* was tested by using the enzyme *BseMI* and the primers Fw/4151-4171(ACGACCAACTCATACACCTGC) and Rv/4301-4281 (TTACTCTATCAAAGTAACTCT).
